# Supplementary material for: Green chemistry: magnetic dispersive solid phase extraction for simultaneous enrichment and determination of V, Ni, Ti and Ga in water samples by HR-CS ETAAS
Source: Royal Society of Chemistry journal article supplement (doi:10.1039/d4ay01809e), 2024-11-14
Supplement: d4ay01809e1.pdf [file d4ay01809e1.pdf]

**Green chemistry: magnetic dispersive solid phase extraction for simultaneous enrichment and determination of V, Ni, Ti and Ga in water samples by HR-CS ETAAS.**

L. Vazquez-Palomo<sup>1</sup>, P. Montoro-Leal<sup>1</sup>, J.C. García-Mesa<sup>1</sup>, M.M. López Guerrero<sup>1\*</sup>, E. Vereda Alonso<sup>1\*\*</sup>

*Department of Analytical Chemistry, Faculty of Sciences, University of Malaga, Campus de Teatinos, 29071, Malaga, Spain*

**Supplementary material**

**Synthesis of M@GO-MTS**

Previously, M@GO was synthesized as is described elsewhere<sup>1-3</sup> and after, M@GO was functionalized as follow: Initially, 0.35 g of M@GO is suspended in a solution comprising 60 mL of ethanol with 0.8% MTS. This suspension is subjected to reflux for a continuous period of 8 hours. The product is meticulously washed three times using methanol and subsequently dried at a temperature of 50°C. The molecular structure of the functionalized M@GO is visually presented in Figures SM1 and SM2. The final stage of functionalization is primarily attributed to the inherent propensity of the introduced functionalization group to undergo oxidation.

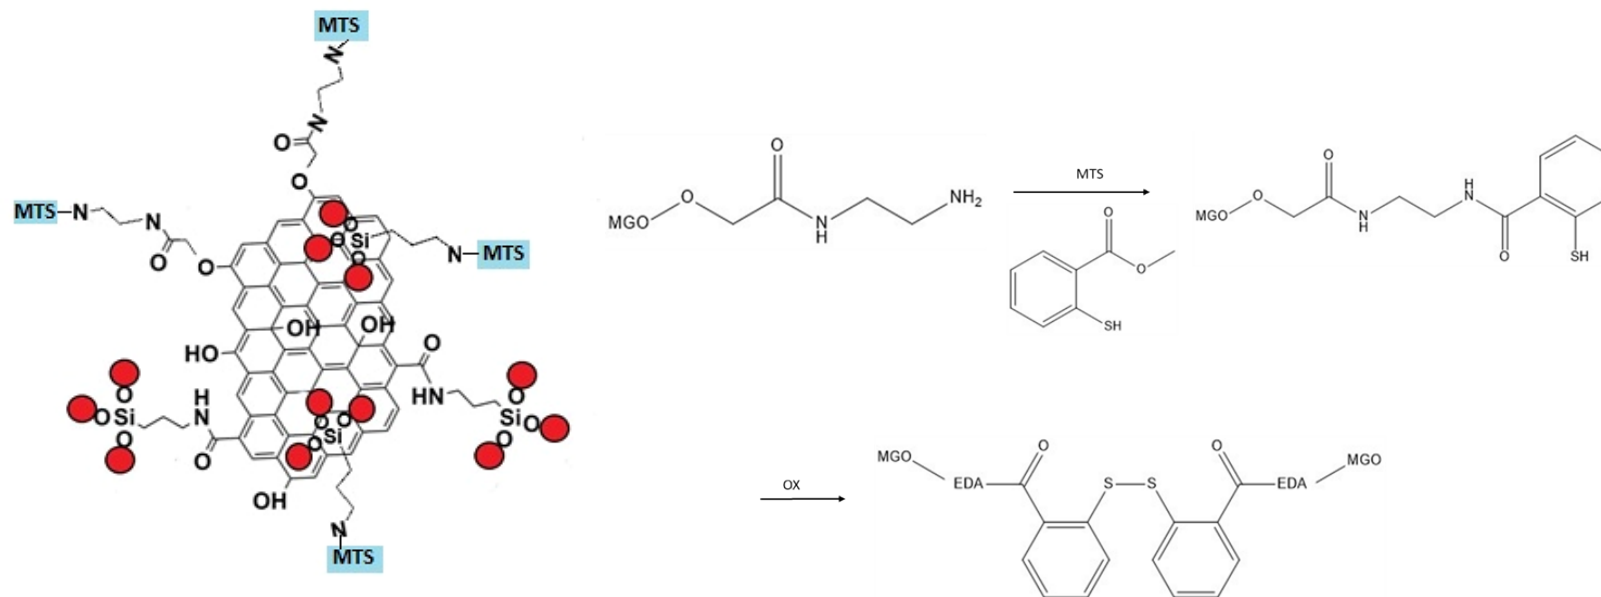

Figure SM1. Structure of functionalized M@GO.

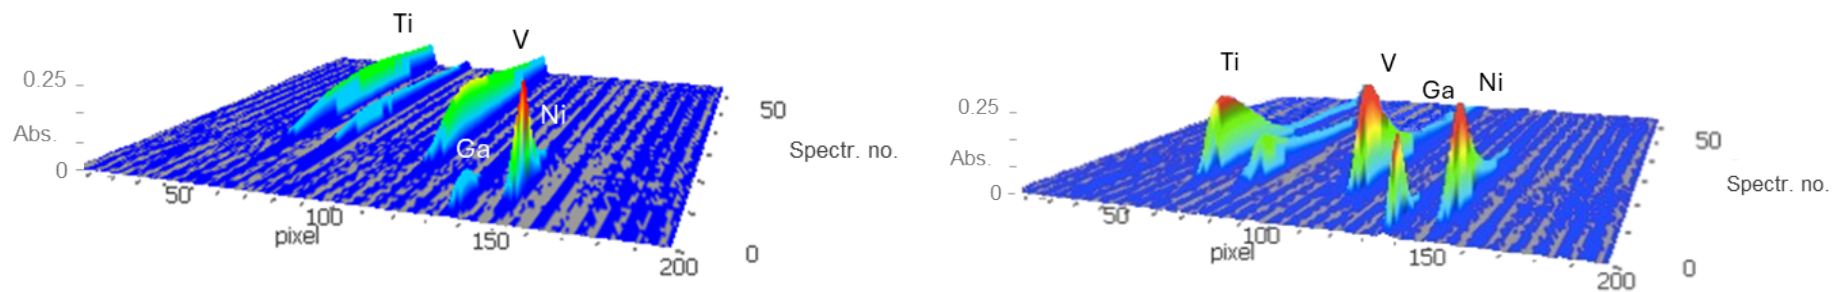

**Fig. SM2. Time resolved absorbance spectra obtained by HR CS GFAAS measurement for  $150.0 \mu\text{g L}^{-1}$  V, Ti,  $300 \mu\text{g L}^{-1}$  Ni and  $15 \mu\text{g L}^{-1}$  Ga (A) without Nb coating, spectral range between 294.1349 and 294.4999 nm; (B) with Nb coating, spectral range from 294.1349 and 294.4999 nm**

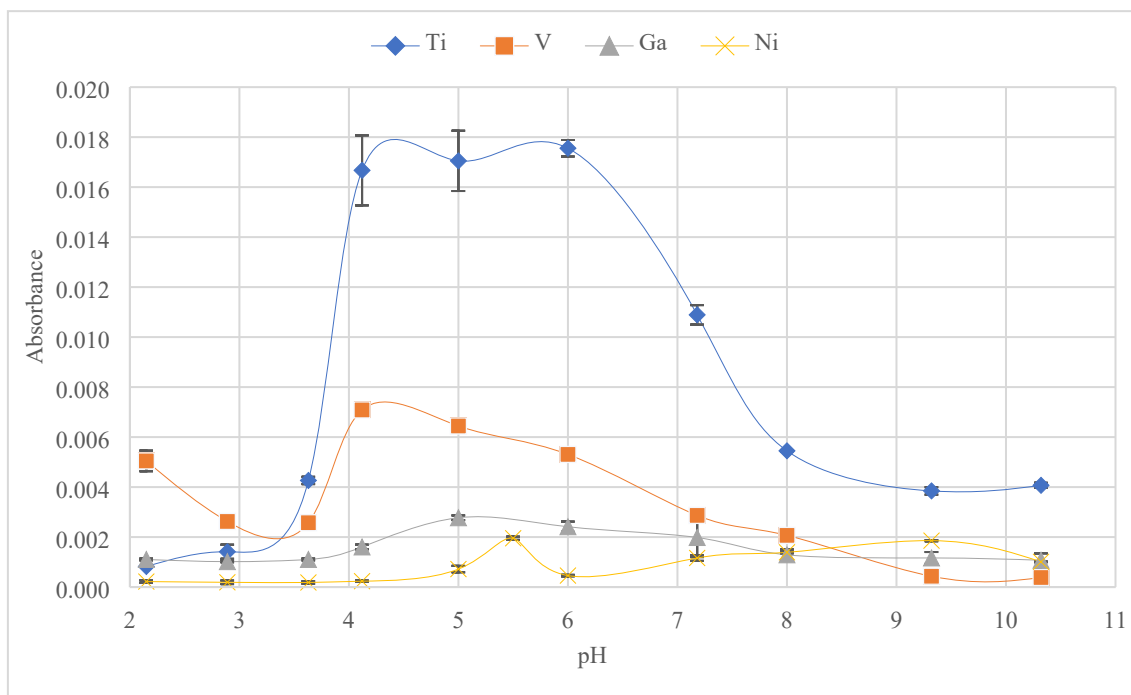

**Figure SM3. Dependence of the pH on the absorption of the element on the sorbent obtained with a standard of  $15.0 \mu\text{g L}^{-1}$  V, Ti,  $30 \mu\text{g L}^{-1}$  Ni and  $1.5 \mu\text{g L}^{-1}$  Ga as described in section 3.2.2. pH study.**

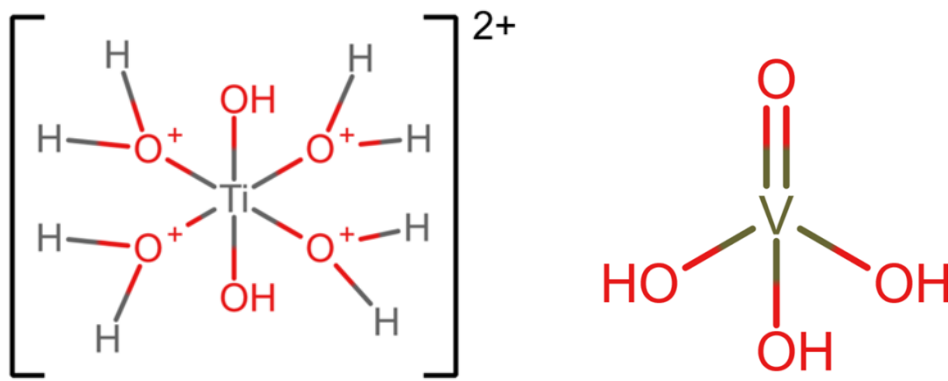

Figure SM4. (A) [TiO]<sup>2+</sup> oxo-cation forms in aqueous solutions and (B) vanadate

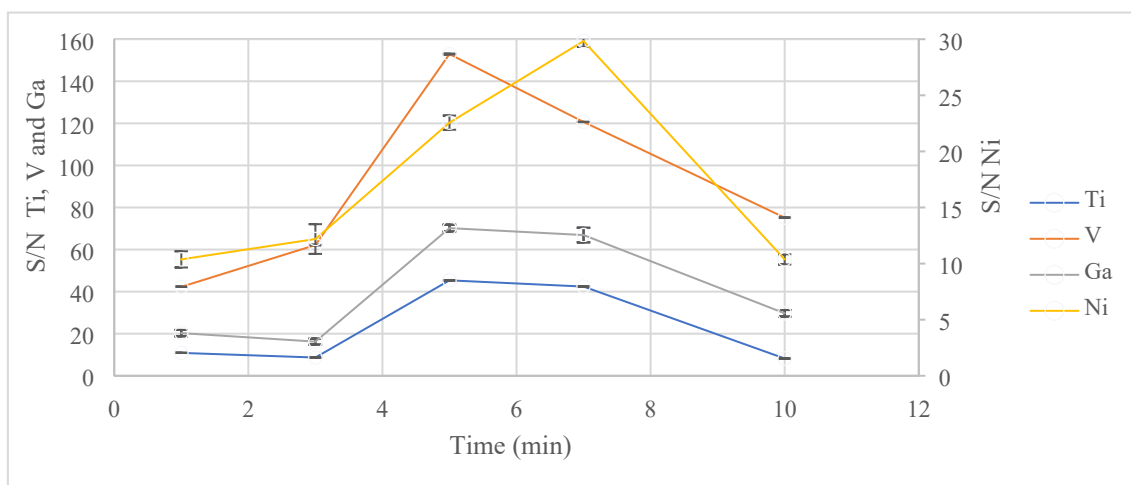

**Figure SM5. Optimization of the adsorption time with a standard with  $15.0 \mu\text{g L}^{-1}$  V, and Ti,  $30 \mu\text{g L}^{-1}$  Ni, and  $15 \mu\text{g L}^{-1}$  Ga. (pH 5.5, 2 mg M@GO-MTS, eluent 1 mL 6 %  $\text{HNO}_3$ , elution time 2 min)**

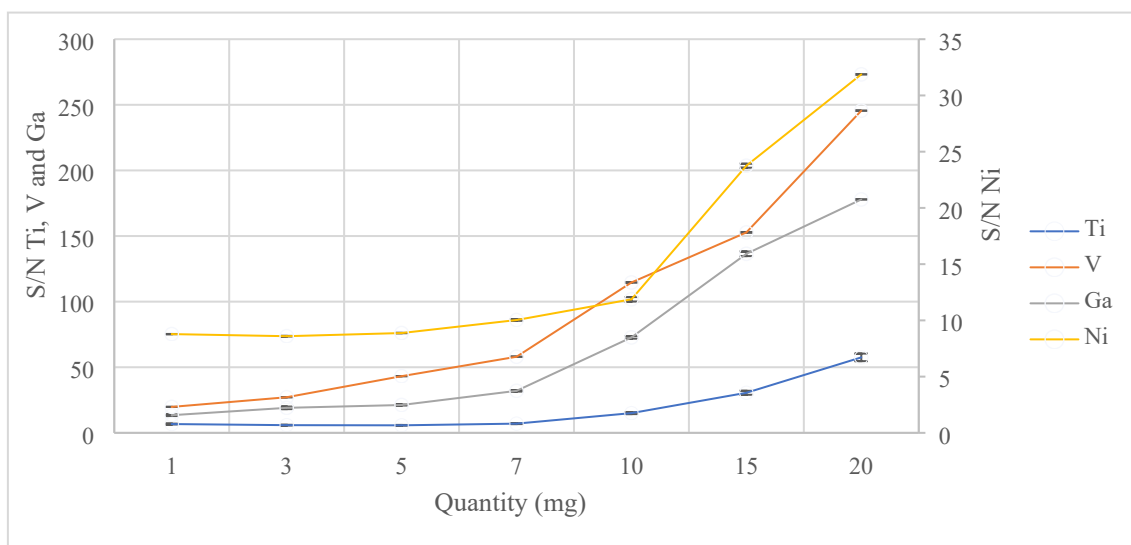

**Figure SM6. Optimization of amount of M@GO-MTS,  $30 \mu\text{g L}^{-1}$  Ti,  $60 \mu\text{g L}^{-1}$  V,  $60 \mu\text{g L}^{-1}$  Ga and  $30 \mu\text{g L}^{-1}$  Ni (pH 5.5, eluent 1 mL 6 %  $\text{HNO}_3$ , adsorption time 5 min).**

## Bibliographic References

- 1 A. González Moreno, M.M. López Guerrero, E. Vereda Alonso, A. García de Torres and J.M. Cano Pavón, *New J. Chem.*, 2017, **41**, 8804–8811.
- 2 P.N. Diagboya, B.I. Olu-Owolabi, D. Zhou and B.H. Han, *Carbon NY*, 2014, **79**, 174–182.
- 3 P. Montoro-Leal, J.C. Garcia-Mesa, M. del M. Lopez Guerrero and E. Vereda Alonso, ES 2 844 942 B2, EP 4 095 097 A1, 2021.
