# Supplementary material for: Green chemistry: magnetic dispersive solid phase extraction for simultaneous enrichment and determination of V, Ni, Ti and Ga in water samples by HR-CS ETAAS
Source: Royal Society of Chemistry journal article supplement (doi:10.1039/d4ay01809e), 2024-11-14
Supplement: d4ay01809e4.pdf [file d4ay01809e4.pdf]

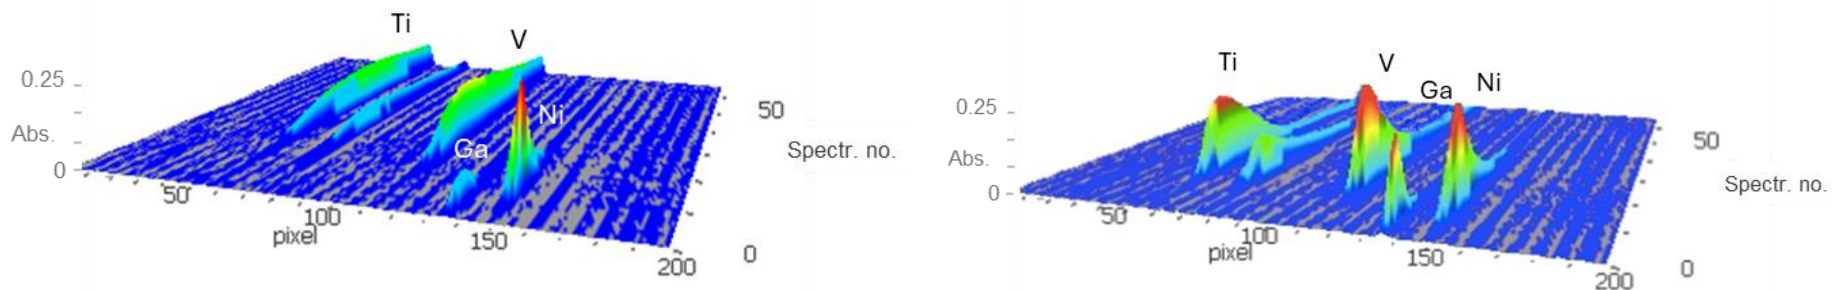

**Fig. SM2.** Time resolved absorbance spectra obtained by HR CS GFAAS measurement for  $150.0 \mu\text{g L}^{-1}$  V, Ti,  $300 \mu\text{g L}^{-1}$  Ni and  $15 \mu\text{g L}^{-1}$  Ga (A) without Nb coating, spectral range between 294.1349 and 294.4999 nm; (B) with Nb coating, spectral range from 294.1349 and 294.4999 nm
