# Supplementary material for: Green chemistry: magnetic dispersive solid phase extraction for simultaneous enrichment and determination of V, Ni, Ti and Ga in water samples by HR-CS ETAAS
Source: Royal Society of Chemistry journal article supplement (doi:10.1039/d4ay01809e), 2024-11-14
Supplement: d4ay01809e5.pdf [file d4ay01809e5.pdf]

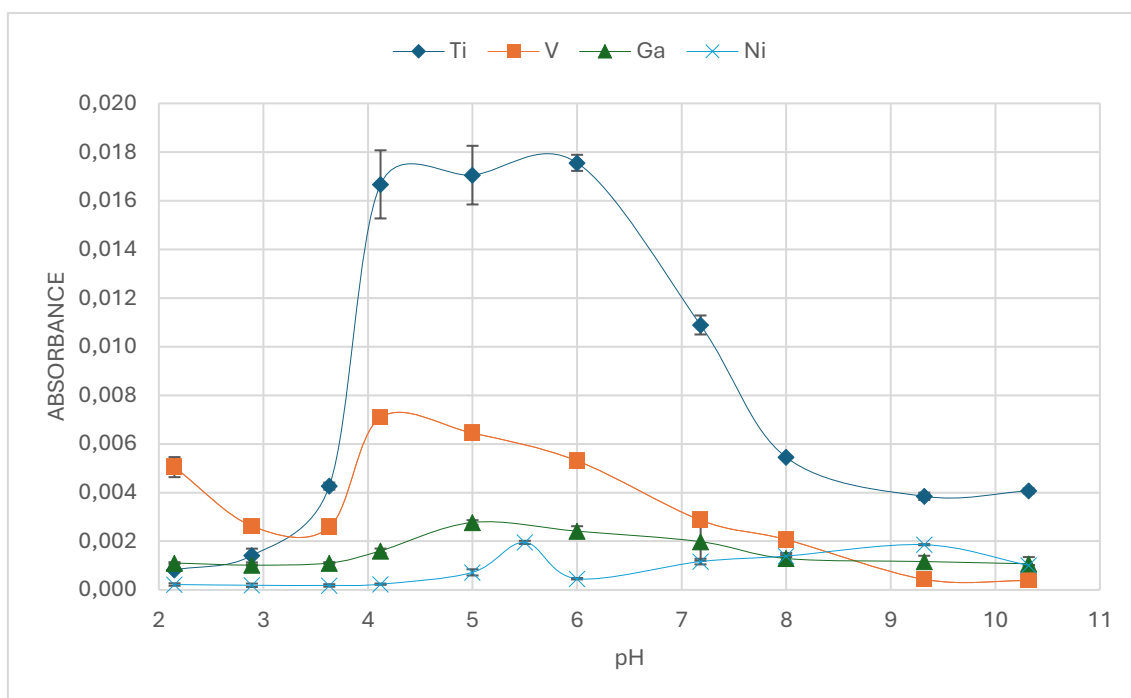

**Figure SM3.** Dependence of the pH on the absorption of the element on the sorbent obtained with a standard of  $15.0 \mu\text{g L}^{-1}$  V, Ti,  $30 \mu\text{g L}^{-1}$  Ni and  $1.5 \mu\text{g L}^{-1}$  Ga as described in section 3.2.2. pH study.
