# Supplementary material for: Green chemistry: magnetic dispersive solid phase extraction for simultaneous enrichment and determination of V, Ni, Ti and Ga in water samples by HR-CS ETAAS
Source: Royal Society of Chemistry journal article supplement (doi:10.1039/d4ay01809e), 2024-11-14
Supplement: d4ay01809e7.pdf [file d4ay01809e7.pdf]

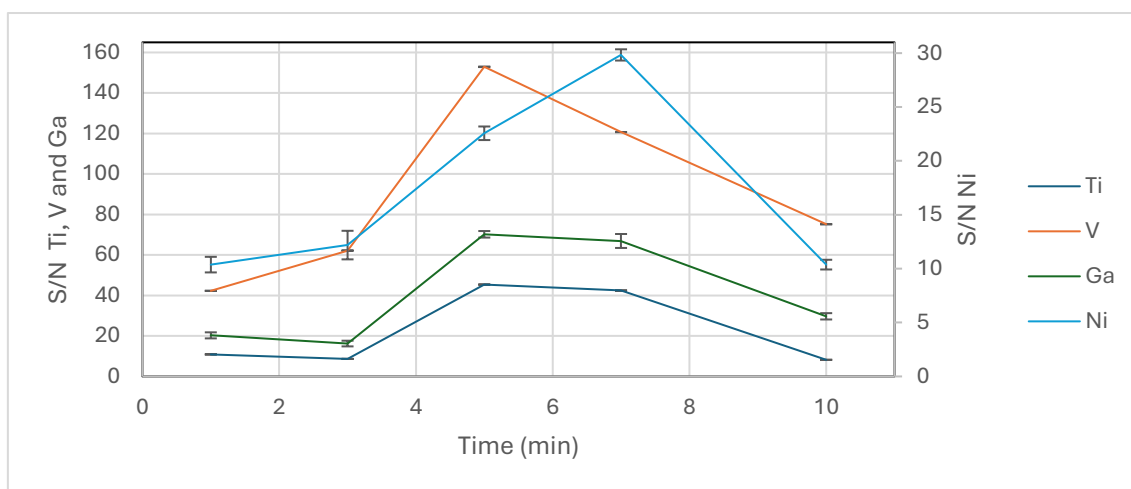

**Figure SM5. Optimization of the adsorption time with a standard with  $15.0 \mu\text{g L}^{-1}$  V, and Ti,  $30 \mu\text{g L}^{-1}$  Ni, and  $15 \mu\text{g L}^{-1}$  Ga. (pH 5.5, 2 mg M@GO-MTS, eluent 1 mL 6 %  $\text{HNO}_3$ , elution time 2 min)**
