# Supplementary material for: Green chemistry: magnetic dispersive solid phase extraction for simultaneous enrichment and determination of V, Ni, Ti and Ga in water samples by HR-CS ETAAS
Source: Royal Society of Chemistry journal article supplement (doi:10.1039/d4ay01809e), 2024-11-14
Supplement: d4ay01809e8.pdf [file d4ay01809e8.pdf]

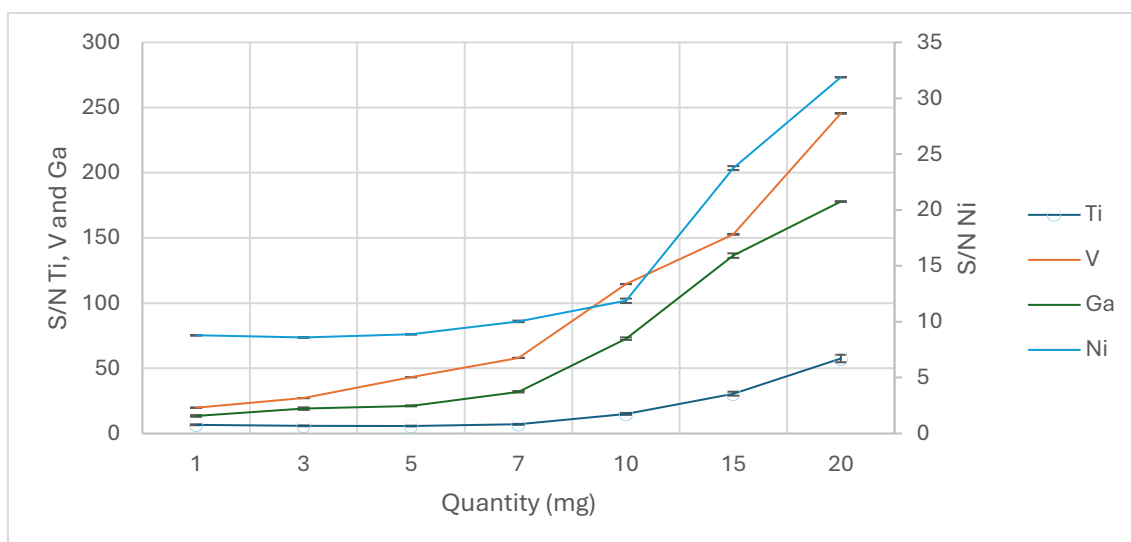

**Figure SM6. Optimization of amount of M@GO-MTS,  $30 \mu\text{g L}^{-1}$  Ti,  $60 \mu\text{g L}^{-1}$  V,  $60 \mu\text{g L}^{-1}$  Ga and  $30 \mu\text{g L}^{-1}$  Ni (pH 5.5, eluent 1 mL 6 %  $\text{HNO}_3$ , adsorption time 5 min).**
