# Supplementary figures and images for: Green chemistry: magnetic dispersive solid phase extraction for simultaneous enrichment and determination of V, Ni, Ti and Ga in water samples by HR-CS ETAAS
Source: Royal Society of Chemistry journal article supplement (doi:10.1039/d4ay01809e), 2024-11-14

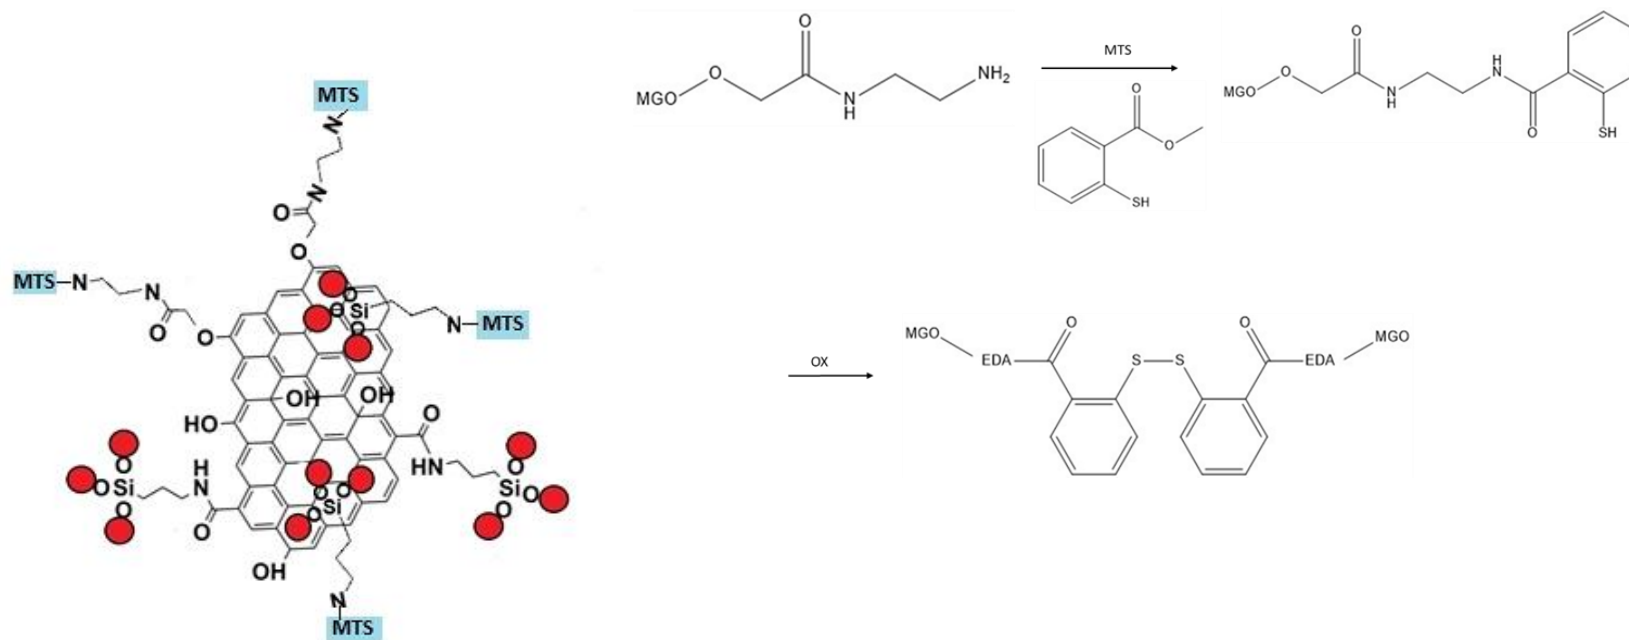

Figure SM1. Structure of functionalized M@GO.

Supplement: d4ay01809e3.pdf [file d4ay01809e3.pdf]

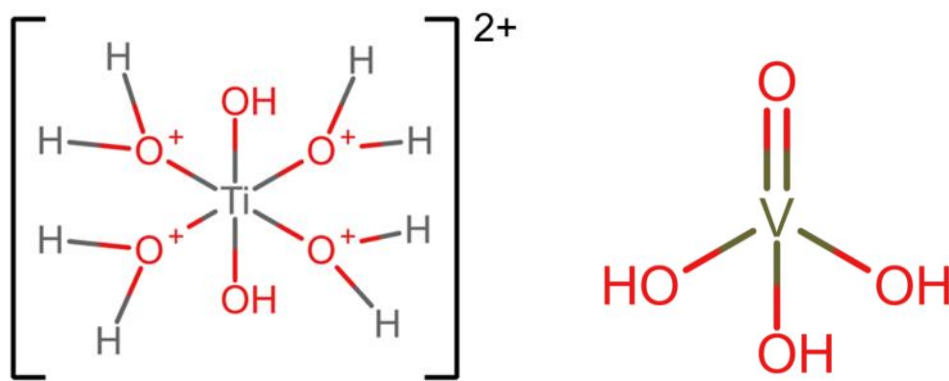

**Figure SM4. (A) [TiO]<sup>2+</sup> oxo-cation forms in aqueous solutions and (B) vanadate**

Supplement: d4ay01809e6.pdf [file d4ay01809e6.pdf]
